# Supplementary material for: Pathways to scale up early childhood programs: A scoping review of Reach Up and Care for Child Development
Source: PubMed Central journal article supplement (PMC10411826; doi:10.1371/journal.pgph.0001542), 2023-08-09
Supplement: pgph.0001542.s004.pdf [file pgph.0001542.s004.pdf]

**S2 Table. Search Terms**

| <b>Population: RU or CCD</b>                                      | <b>Context: Implementation</b>            | <b>Concept: Multisectorality</b>         |
|-------------------------------------------------------------------|-------------------------------------------|------------------------------------------|
| ( <b>"Reach up"</b>                                               | AND ( <b>"implementation facilitat**"</b> | AND ( <b>"nurturing care"</b>            |
| OR <b>"Care for Child Development"</b>                            | OR <b>"implementation barrier**"</b> OR   | OR <b>"nurturing interaction**"</b>      |
| OR <b>"Care for Development"</b>                                  | <b>"barriers to implemen**"</b>           | OR <b>multisectoral*</b>                 |
| OR <b>"Chile Crece Contigo"</b>                                   | OR <b>"implementation science**"</b>      | OR <b>intersectoral*</b>                 |
| OR <b>"Jamaican Intervention"</b>                                 | OR <b>"implementation strateg**"</b> OR   | OR <b>"multiple sector**"</b>            |
| OR <b>"Caring for the Child's Healthy Growth and Development"</b> | <b>"implemented strateg**"</b>            | OR <b>"responsive caregiving"</b>        |
| OR <b>"China REACH"</b>                                           | OR <b>"implementation outcome**"</b>      | OR <b>"integrated intervention**"</b>    |
| OR <b>"Rural Education and Child Health Project"</b>              | OR <b>"implementation challenge**"</b>    | OR <b>"integrated approach**"</b>        |
| OR <b>"Cuna Mas"</b>                                              | OR <b>"implementation evaluation"</b>     | OR <b>"integrated system**"</b>          |
| OR <b>"Learning Club**"</b>                                       | OR <b>"intervention adopt**"</b> OR       | OR <b>"integrated service**"</b>         |
| OR <b>Urban95</b>                                                 | <b>"adopted intervent**"</b>              | OR <b>"integrated strateg**"</b>         |
| OR <b>Istanbul95</b>                                              | OR <b>"implementation research**"</b>     | OR <b>"integrated program**"</b>         |
| OR <b>"Sugira Muryango"</b>                                       | OR <b>spread</b>                          | OR <b>"integrated curricul**"</b>        |
| OR <b>Anganwadi</b>                                               | OR <b>sustain*</b>                        | OR <b>"different delivery strateg**"</b> |
| OR <b>"Family Women and Infancy Program"</b>                      | OR <b>uptake</b>                          | OR <b>"multicomponent intervention")</b> |
| OR <b>"early child development"</b>                               | OR <b>penetration</b>                     |                                          |
| OR <b>"early childhood"</b>                                       | OR <b>acceptability</b>                   |                                          |
| OR <b>"home visit**"</b>                                          | OR <b>acceptable</b>                      |                                          |
| OR <b>"home based intervention"</b>                               | OR <b>appropriate*</b>                    |                                          |
| OR <b>"parenting skill**"</b>                                     | OR <b>feasib*</b>                         |                                          |
| OR <b>"psychosocial intervention"</b>                             | OR <b>fidelity</b>                        |                                          |
| OR <b>"responsive caregiv**"</b>                                  | OR <b>efficien*</b>                       |                                          |
| OR <b>"responsive parent**")</b>                                  | OR <b>"patient-centered"</b>              |                                          |
|                                                                   | OR <b>adapt*</b>                          |                                          |
|                                                                   | OR <b>dissemin*</b>                       |                                          |
|                                                                   | OR <b>"enabling environment"</b>          |                                          |
|                                                                   | OR <b>efficac*</b>                        |                                          |
|                                                                   | OR <b>"contextual factor**"</b>           |                                          |
|                                                                   | OR <b>"process evaluation")</b>           |                                          |
