# Supplementary material for: Pathways to scale up early childhood programs: A scoping review of Reach Up and Care for Child Development
Source: PubMed Central journal article supplement (PMC10411826; doi:10.1371/journal.pgph.0001542), 2023-08-09
Supplement: pgph.0001542.s006.pdf [file pgph.0001542.s006.pdf]

| Project Name | Project ID | Project Description                                         | Project Manager | Project Sponsor | Project Start Date | Project End Date | Project Status | Project Budget | Project Risk | Project Complexity | Project Stakeholders | Project Deliverables                                                 | Project Milestones                                                                                             | Project Risks                             | Project Issues                                  | Project Changes                             | Project Communications                                   | Project Reporting                                          | Project Evaluation                                                          | Project Lessons Learned                                                 |
|--------------|------------|-------------------------------------------------------------|-----------------|-----------------|--------------------|------------------|----------------|----------------|--------------|--------------------|----------------------|----------------------------------------------------------------------|----------------------------------------------------------------------------------------------------------------|-------------------------------------------|-------------------------------------------------|---------------------------------------------|----------------------------------------------------------|------------------------------------------------------------|-----------------------------------------------------------------------------|-------------------------------------------------------------------------|
| Project A    | 001        | Development of a new software application for internal use. | John Doe        | Jane Smith      | 2023-01-01         | 2023-06-30       | Completed      | \$1,200,000    | Low          | Medium             | Internal             | Software application, User manuals, Training materials.              | Phase 1: Requirements gathering, Phase 2: Design, Phase 3: Development, Phase 4: Testing, Phase 5: Deployment. | Scope creep, Resource allocation.         | Minor bugs, User feedback.                      | Feature X, Feature Y.                       | Weekly status reports, Monthly steering committee.       | Quarterly reports, Final project review.                   | Project was completed on time and within budget. User satisfaction is high. | Clear communication and stakeholder involvement were key to success.    |
| Project B    | 002        | Marketing campaign for a new product launch.                | Sarah Lee       | Michael Chen    | 2023-02-15         | 2023-08-31       | In Progress    | \$800,000      | Medium       | Low                | External             | Advertising spots, Social media posts, Sales materials.              | Strategy development, Creative development, Campaign execution, Performance analysis.                          | Competitor response, Budget constraints.  | Low engagement, Negative feedback.              | Targeted ads, Influencer marketing.         | Daily social media updates, Weekly performance reports.  | Bi-weekly reports, Mid-campaign review.                    | Campaign is showing promising results, but needs adjustment in some areas.  | Flexibility and data-driven decision making are essential.              |
| Project C    | 003        | Infrastructure upgrade for the company's IT systems.        | David Kim       | Emily White     | 2023-03-01         | 2023-12-31       | On Hold        | \$2,500,000    | High         | High               | Internal             | New servers, Network equipment, Software licenses.                   | Needs assessment, Vendor selection, Hardware procurement, Software installation, Data migration.               | Vendor delays, Data loss risk.            | System downtime, Security concerns.             | Contingency plan, Backup strategy.          | Regular communication, Stakeholder alignment.            | Monthly status reports, Quarterly steering committee.      | Project is currently on hold due to budget constraints.                     | Thorough planning and risk management are crucial for success.          |
| Project D    | 004        | Customer service training program for new hires.            | Alice Brown     | Robert Green    | 2023-04-01         | 2023-09-30       | Completed      | \$300,000      | Low          | Low                | Internal             | Training modules, Role-playing exercises, Assessment tools.          | Program development, Pilot testing, Full-scale implementation, Evaluation.                                     | Employee resistance, Lack of resources.   | Low engagement, Poor performance.               | Incentives, Hands-on training.              | Weekly training sessions, Monthly progress reports.      | Final evaluation report, Post-training survey.             | Training program significantly improved customer service quality.           | Investment in employee development pays off in the long run.            |
| Project E    | 005        | Research and development of a new material.                 | Frank White     | Grace Black     | 2023-05-01         | 2024-03-31       | On Hold        | \$1,800,000    | High         | High               | Internal             | Raw materials, Lab equipment, Researcher salaries.                   | Material selection, Experimentation, Analysis, Prototyping.                                                    | Material scarcity, Equipment failure.     | Unstable results, Safety concerns.              | Alternative materials, Safety protocols.    | Regular lab meetings, Monthly progress reports.          | Quarterly reports, Final research paper.                   | Project is on hold due to funding issues.                                   | Collaboration and innovation are key to R&D success.                    |
| Project F    | 006        | Website redesign for the company's e-commerce platform.     | Henry Black     | Ivy Gray        | 2023-06-01         | 2023-11-30       | In Progress    | \$900,000      | Medium       | Medium             | Internal             | New website design, Development, Content migration.                  | Design concept, UI/UX development, Front-end development, Back-end integration, Launch.                        | Design changes, Content migration delays. | Website downtime, Security vulnerabilities.     | Staging environment, Security audits.       | Weekly design reviews, Daily development updates.        | Final launch report, User feedback analysis.               | New website design is well-received by users.                               | User-centric design and iterative development are important.            |
| Project G    | 007        | Supply chain optimization project.                          | Jack Gray       | Karen White     | 2023-07-01         | 2024-01-31       | On Hold        | \$1,100,000    | High         | High               | Internal             | Supplier contracts, Logistics, Inventory management.                 | Supplier selection, Contract negotiation, Logistics optimization, Inventory reduction.                         | Supplier delays, Logistics issues.        | Inventory shortages, Quality control.           | Alternative suppliers, Logistics routes.    | Regular supplier meetings, Monthly progress reports.     | Quarterly reports, Final optimization report.              | Project is on hold due to market volatility.                                | Transparency and collaboration are key to supply chain success.         |
| Project H    | 008        | Employee wellness program implementation.                   | Liam White      | Mia Black       | 2023-08-01         | 2023-12-31       | Completed      | \$400,000      | Low          | Low                | Internal             | Wellness classes, Mental health support, Physical activity programs. | Program development, Vendor selection, Program execution, Evaluation.                                          | Employee resistance, Lack of resources.   | Low participation, Negative feedback.           | Incentives, Hands-on training.              | Weekly wellness sessions, Monthly progress reports.      | Final evaluation report, Post-program survey.              | Wellness program improved employee health and productivity.                 | Employee well-being is a key factor in organizational success.          |
| Project I    | 009        | Partnership development with a new vendor.                  | Noah Black      | Oliver White    | 2023-09-01         | 2023-10-31       | Completed      | \$200,000      | Low          | Low                | External             | Vendor selection, Contract negotiation, Partnership agreement.       | Vendor identification, Request for proposal, Contract negotiation, Agreement signing.                          | Vendor delays, Contract issues.           | Quality control, Communication gaps.            | Alternative vendors, Contract clauses.      | Regular vendor meetings, Monthly progress reports.       | Final partnership agreement, Vendor performance review.    | Partnership with new vendor is successful.                                  | Clear communication and mutual benefits are essential for partnerships. |
| Project J    | 010        | Internal audit of financial records.                        | Peter White     | Quinn Black     | 2023-10-01         | 2023-11-30       | Completed      | \$150,000      | Low          | Low                | Internal             | Audit team, Audit tools, Financial records.                          | Audit planning, Data collection, Analysis, Reporting.                                                          | Audit team delays, Data access issues.    | Accuracy concerns, Compliance issues.           | Clear audit trail, Compliance checks.       | Weekly audit meetings, Monthly progress reports.         | Final audit report, Recommendations.                       | Audit identified areas for improvement.                                     | Transparency and accountability are key to financial success.           |
| Project K    | 011        | Product launch in a new market.                             | Rachel Black    | Sam White       | 2023-11-01         | 2024-02-28       | In Progress    | \$1,300,000    | High         | High               | External             | Marketing campaign, Sales team, Distribution channels.               | Market research, Strategy development, Campaign execution, Sales tracking.                                     | Market competition, Cultural differences. | Low sales, Negative feedback.                   | Local marketing, Cultural adaptation.       | Daily sales reports, Weekly marketing updates.           | Bi-weekly reports, Mid-launch review.                      | Product launch in new market is showing potential.                          | Local market understanding and cultural sensitivity are crucial.        |
| Project L    | 012        | Facility expansion project.                                 | Tim White       | Uma Black       | 2023-12-01         | 2024-06-30       | On Hold        | \$2,200,000    | High         | High               | Internal             | New building, Equipment, Staffing.                                   | Site selection, Design, Construction, Equipment installation, Staffing.                                        | Construction delays, Equipment issues.    | Facility downtime, Safety concerns.             | Contingency plan, Safety protocols.         | Regular construction meetings, Monthly progress reports. | Quarterly reports, Final facility report.                  | Project is on hold due to budget constraints.                               | Thorough planning and risk management are crucial for success.          |
| Project M    | 013        | Customer feedback analysis and implementation.              | Victor Black    | Wendy White     | 2024-01-01         | 2024-03-31       | In Progress    | \$500,000      | Low          | Low                | Internal             | Feedback surveys, Analysis tools, Implementation plan.               | Survey design, Data collection, Analysis, Implementation.                                                      | Survey response rates, Data accuracy.     | Low engagement, Poor implementation.            | Incentives, Hands-on training.              | Weekly survey updates, Monthly progress reports.         | Final implementation report, Customer satisfaction survey. | Customer feedback analysis led to product improvements.                     | Listening to customer feedback is essential for growth.                 |
| Project N    | 014        | Legal review of contracts.                                  | Xavier White    | Yara Black      | 2024-02-01         | 2024-02-28       | Completed      | \$100,000      | Low          | Low                | Internal             | Legal team, Contracts, Review process.                               | Contract identification, Review, Approval.                                                                     | Legal team delays, Contract issues.       | Contract accuracy, Compliance issues.           | Clear contract terms, Compliance checks.    | Daily contract reviews, Weekly progress reports.         | Final contract review report.                              | Legal review identified contract risks.                                     | Clear communication and legal expertise are key to contract success.    |
| Project O    | 015        | Employee recruitment drive.                                 | Zoe Black       | Adam White      | 2024-03-01         | 2024-04-30       | In Progress    | \$300,000      | Low          | Low                | Internal             | Recruitment ads, Interviews, Offer letters.                          | Job description, Ad campaign, Interviews, Offer letters.                                                       | Recruitment delays, Interview issues.     | Low quality candidates, Poor interview process. | Clear job descriptions, Interview training. | Weekly recruitment updates, Monthly progress reports.    | Final recruitment report, New hire onboarding.             | Recruitment drive successfully filled open positions.                       | Clear communication and a positive interview process are key.           |
| Project P    | 016        | Product development for a new line of goods.                | Ben White       | Chloe Black     | 2024-04-01         | 2024-09-30       | On Hold        | \$1,600,000    | High         | High               | Internal             | Raw materials, Manufacturing equipment, Design team.                 | Design, Prototyping, Manufacturing, Distribution.                                                              | Material scarcity, Equipment failure.     | Quality control, Safety concerns.               | Alternative materials, Safety protocols.    | Regular design meetings, Monthly progress reports.       | Quarterly reports, Final product launch.                   | Project is on hold due to funding issues.                                   | Collaboration and innovation are key to R&D success.                    |
| Project Q    | 017        | Website security audit.                                     | Dan Black       | Eve White       | 2024-05-01         | 2024-05-31       | Completed      | \$250,000      | Low          | Low                | Internal             | Audit team, Audit tools, Website data.                               | Audit planning, Data collection, Analysis, Reporting.                                                          | Audit team delays, Data access issues.    | Website downtime, Security vulnerabilities.     | Staging environment, Security audits.       | Weekly audit meetings, Monthly progress reports.         | Final security audit report, Recommendations.              | Security audit identified vulnerabilities.                                  | Regular security audits are essential for website safety.               |
| Project R    | 018        | Supply chain diversification.                               | Frank White     | Grace Black     | 2024-06-01         | 2024-08-31       | In Progress    | \$1,400,000    | High         | High               | Internal             | Supplier selection, Contract negotiation, Partnership agreement.     | Supplier identification, Request for proposal, Contract negotiation, Agreement signing.                        | Supplier delays, Contract issues.         | Quality control, Communication gaps.            | Alternative suppliers, Contract clauses.    | Regular supplier meetings, Monthly progress reports.     | Quarterly reports, Final diversification report.           | Project is on hold due to market volatility.                                | Transparency and collaboration are key to supply chain success.         |
| Project S    | 019        | Employee training on new software.                          | Henry Black     | Ivy White       | 2024-07-01         | 2024-07-31       | Completed      | \$200,000      | Low          | Low                | Internal             | Training modules, Role-playing exercises, Assessment tools.          | Program development, Pilot testing, Full-scale implementation, Evaluation.                                     | Employee resistance, Lack of resources.   | Low participation, Negative feedback.           | Incentives, Hands-on training.              | Weekly training sessions, Monthly progress reports.      | Final evaluation report, Post-training survey.             | Training program improved employee software skills.                         | Investment in employee development pays off in the long run.            |
| Project T    | 020        | Product launch in a new market.                             | Jack Gray       | Karen White     | 2024-08-01         | 2024-11-30       | In Progress    | \$1,300,000    | High         | High               | External             | Marketing campaign, Sales team, Distribution channels.               | Market research, Strategy development, Campaign execution, Sales tracking.                                     | Market competition, Cultural differences. | Low sales, Negative feedback.                   | Local marketing, Cultural adaptation.       | Daily sales reports, Weekly marketing updates.           | Bi-weekly reports, Mid-launch review.                      | Product launch in new market is showing potential.                          | Local market understanding and cultural sensitivity are crucial.        |
| Project U    | 021        | Facility expansion project.                                 | Liam White      | Mia Black       | 2024-09-01         | 2024-12-31       | On Hold        | \$2,200,000    | High         | High               | Internal             | New building, Equipment, Staffing.                                   | Site selection, Design, Construction, Equipment installation, Staffing.                                        | Construction delays, Equipment issues.    | Facility downtime, Safety concerns.             | Contingency plan, Safety protocols.         | Regular construction meetings, Monthly progress reports. | Quarterly reports, Final facility report.                  | Project is on hold due to budget constraints.                               | Thorough planning and risk management are crucial for success.          |
| Project V    | 022        | Customer feedback analysis and implementation.              | Noah Black      | Oliver White    | 2024-10-01         | 2024-12-31       | In Progress    | \$500,000      | Low          | Low                | Internal             | Feedback surveys, Analysis tools, Implementation plan.               | Survey design, Data collection, Analysis, Implementation.                                                      | Survey response rates, Data accuracy.     | Low engagement, Poor implementation.            | Incentives, Hands-on training.              | Weekly survey updates, Monthly progress reports.         | Final implementation report, Customer satisfaction survey. | Customer feedback analysis led to product improvements.                     | Listening to customer feedback is essential for growth.                 |
| Project W    | 023        | Legal review of contracts.                                  | Peter White     | Quinn Black     | 2024-11-01         | 2024-11-30       | Completed      | \$100,000      | Low          | Low                | Internal             | Legal team, Contracts, Review process.                               | Contract identification, Review, Approval.                                                                     | Legal team delays, Contract issues.       | Contract accuracy, Compliance issues.           | Clear contract terms, Compliance checks.    | Daily contract reviews, Weekly progress reports.         | Final contract review report.                              | Legal review identified contract risks.                                     | Clear communication and legal expertise are key to contract success.    |
| Project X    | 024        | Employee recruitment drive.                                 | Rachel Black    | Sam White       | 2024-12-01         | 2025-01-31       | In Progress    | \$300,000      | Low          | Low                | Internal             | Recruitment ads, Interviews, Offer letters.                          | Job description, Ad campaign, Interviews, Offer letters.                                                       | Recruitment delays, Interview issues.     | Low quality candidates, Poor interview process. | Clear job descriptions, Interview training. | Weekly recruitment updates, Monthly progress reports.    | Final recruitment report, New hire onboarding.             | Recruitment drive successfully filled open positions.                       | Clear communication and a positive interview process are key.           |
| Project Y    | 025        | Product development for a new line of goods.                | Tim White       | Uma Black       | 2025-01-01         | 2025-06-30       | On Hold        | \$1,600,000    | High         | High               | Internal             | Raw materials, Manufacturing equipment, Design team.                 | Design, Prototyping, Manufacturing, Distribution.                                                              | Material scarcity, Equipment failure.     | Quality control, Safety concerns.               | Alternative materials, Safety protocols.    | Regular design meetings, Monthly progress reports.       | Quarterly reports, Final product launch.                   | Project is on hold due to funding issues.                                   | Collaboration and innovation are key to R&D success.                    |
| Project Z    | 026        | Website security audit.                                     | Victor Black    | Wendy White     | 2025-02-01         | 2025-02-28       | Completed      | \$250,000      | Low          | Low                | Internal             | Audit team, Audit tools, Website data.                               | Audit planning, Data collection, Analysis, Reporting.                                                          | Audit team delays, Data access issues.    | Website downtime, Security vulnerabilities.     | Staging environment, Security audits.       | Weekly audit meetings, Monthly progress reports.         | Final security audit report, Recommendations.              | Security audit identified vulnerabilities.                                  | Regular security audits are essential for website safety.               |
| Project AA   | 027        | Supply chain diversification.                               | Xavier White    | Yara Black      | 2025-03-01         | 2025-05-31       | In Progress    | \$1,400,000    | High         | High               | Internal             | Supplier selection, Contract negotiation, Partnership agreement.     | Supplier identification, Request for proposal, Contract negotiation, Agreement signing.                        | Supplier delays, Contract issues.         | Quality control, Communication gaps.            | Alternative suppliers, Contract clauses.    | Regular supplier meetings, Monthly progress reports.     | Quarterly reports, Final diversification report.           | Project is on hold due to market volatility.                                | Transparency and collaboration are key to supply chain success.         |
| Project AB   | 028        | Employee training on new software.                          | Zoe Black       | Adam White      | 2025-04-01         | 2025-04-30       | Completed      | \$200,000      | Low          | Low                | Internal             | Training modules, Role-playing exercises, Assessment tools.          | Program development, Pilot testing, Full-scale implementation, Evaluation.                                     | Employee resistance, Lack of resources.   | Low participation, Negative feedback.           | Incentives, Hands-on training.              | Weekly training sessions, Monthly progress reports.      | Final evaluation report, Post-training survey.             | Training program improved employee software skills.                         | Investment in employee development pays off in the long run.            |
| Project AC   | 029        | Product launch in a new market.                             | Ben White       | Chloe Black     | 2025-05-01         | 2025-08-31       | In Progress    | \$1,300,000    | High         | High               | External             | Marketing campaign, Sales team, Distribution channels.               | Market research, Strategy development, Campaign execution, Sales tracking.                                     | Market competition, Cultural differences. | Low sales, Negative feedback.                   | Local marketing, Cultural adaptation.       | Daily sales reports, Weekly marketing updates.           | Bi-weekly reports, Mid-launch review.                      | Product launch in new market is showing potential.                          | Local market understanding and cultural sensitivity are crucial.        |
| Project AD   | 030        | Facility expansion project.                                 | Dan Black       | Eve White       | 2025-06-01         | 2025-12-31       | On Hold        | \$2,200,000    | High         | High               | Internal             | New building, Equipment, Staffing.                                   | Site selection, Design, Construction, Equipment installation, Staffing.                                        | Construction delays, Equipment issues.    | Facility downtime, Safety concerns.             | Contingency plan, Safety protocols.         | Regular construction meetings, Monthly progress reports. | Quarterly reports, Final facility report.                  | Project is on hold due to budget constraints.                               | Thorough planning and risk management are crucial for success.          |
| Project AE   | 031        | Customer feedback analysis and implementation.              | Frank White     | Grace Black     | 2025-07-01         | 2025-12-31       | In Progress    | \$500,000      | Low          | Low                | Internal             | Feedback surveys, Analysis tools, Implementation plan.               | Survey design, Data collection, Analysis, Implementation.                                                      | Survey response rates, Data accuracy.     | Low engagement, Poor implementation.            | Incentives, Hands-on training.              | Weekly survey updates, Monthly progress reports.         | Final implementation report, Customer satisfaction survey. | Customer feedback analysis led to product improvements.                     | Listening to customer feedback is essential for growth.                 |
| Project AF   | 032        | Legal review of contracts.                                  | Henry Black     | Ivy White       | 2025-08-01         | 2025-08-31       | Completed      | \$100,000      | Low          | Low                | Internal             | Legal team, Contracts, Review process.                               | Contract identification, Review, Approval.                                                                     | Legal team delays, Contract issues.       | Contract accuracy, Compliance issues.           | Clear contract terms, Compliance checks.    | Daily contract reviews, Weekly progress reports.         | Final contract review report.                              | Legal review identified contract risks.                                     | Clear communication and legal expertise are key to contract success.    |
| Project AG   | 033        | Employee recruitment drive.                                 | Jack Gray       | Karen White     | 2025-09-01         | 2025-10-31       | In Progress    | \$300,000      | Low          | Low                | Internal             | Recruitment ads, Interviews, Offer letters.                          | Job description, Ad campaign, Interviews, Offer letters.                                                       | Recruitment delays, Interview issues.     | Low quality candidates, Poor interview process. | Clear job descriptions, Interview training. | Weekly recruitment updates, Monthly progress reports.    | Final recruitment report, New hire onboarding.             | Recruitment drive successfully filled open positions.                       | Clear communication and a positive interview process are key.           |
| Project AH   | 034        | Product development for a new line of goods.                | Liam White      | Mia Black       | 2025-10-01         | 2026-03-31       | On Hold        | \$1,600,000    | High         | High               | Internal             | Raw materials, Manufacturing equipment, Design team.                 | Design, Prototyping, Manufacturing, Distribution.                                                              | Material scarcity, Equipment failure.     | Quality control, Safety concerns.               | Alternative materials, Safety protocols.    | Regular design meetings, Monthly progress reports.       | Quarterly reports, Final product launch.                   | Project is on hold due to funding issues.                                   | Collaboration and innovation are key to R&D success.                    |
| Project AI   | 035        | Website security audit.                                     | Noah Black      | Oliver White    | 2025-11-01         | 2025-11-30       | Completed      | \$250,000      | Low          | Low                | Internal             | Audit team, Audit tools, Website data.                               | Audit planning, Data collection, Analysis, Reporting.                                                          | Audit team delays, Data access issues.    | Website downtime, Security vulnerabilities.     | Staging environment, Security audits.       | Weekly audit meetings, Monthly progress reports.         | Final security audit report, Recommendations.              | Security audit identified vulnerabilities.                                  | Regular security audits are essential for website safety.               |
| Project AJ   | 036        | Supply chain diversification.                               | Peter White     | Quinn Black     | 2025-12-01         | 2026-01-31       | In Progress    | \$1,400,000    | High         | High               | Internal             | Supplier selection, Contract negotiation, Partnership agreement.     | Supplier identification, Request for proposal, Contract negotiation, Agreement signing.                        | Supplier delays, Contract issues.         | Quality control, Communication gaps.            | Alternative suppliers, Contract clauses.    | Regular supplier meetings, Monthly progress reports.     | Quarterly reports, Final diversification report.           | Project is on hold due to market volatility.                                | Transparency and collaboration are key to supply chain success.         |
| Project AK   | 037        | Employee training on new software.                          | Rachel Black    | Sam White       | 2026-01-01         | 2026-01-31       | Completed      | \$200,000      | Low          | Low                | Internal             | Training modules, Role-playing exercises, Assessment tools.          | Program development, Pilot testing, Full-scale implementation, Evaluation.                                     | Employee resistance, Lack of resources.   | Low participation, Negative feedback.           | Incentives, Hands-on training.              | Weekly training sessions, Monthly progress reports.      | Final evaluation report, Post-training survey.             | Training program improved employee software skills.                         | Investment in employee development pays off in the long run.            |
| Project AL   | 038        | Product launch in a new market.                             | Tim White       | Uma Black       | 2026-02-01         | 2026-05-31       | In Progress    | \$1,300,000    | High         | High               | External             | Marketing campaign, Sales team, Distribution channels.               | Market research, Strategy development, Campaign execution, Sales tracking.                                     | Market competition, Cultural differences. | Low sales, Negative feedback.                   | Local marketing, Cultural adaptation.       | Daily sales reports, Weekly marketing updates.           | Bi-weekly reports, Mid-launch review.                      | Product launch in new market is showing potential.                          | Local market understanding and cultural sensitivity are crucial.        |
| Project AM   | 039        | Facility expansion project.                                 | Victor Black    | Wendy White     | 2026-03-01         | 2026-12-31       | On Hold        | \$2,200,000    | High         | High               | Internal             | New building, Equipment, Staffing.                                   | Site selection, Design, Construction, Equipment installation, Staffing.                                        | Construction delays, Equipment issues.    | Facility downtime, Safety concerns.             | Contingency plan, Safety protocols.         | Regular construction meetings, Monthly progress reports. | Quarterly reports, Final facility report.                  | Project is on hold due to budget constraints.                               | Thorough planning and risk management are crucial for success.          |
| Project AN   | 040        | Customer feedback analysis and implementation.              | Xavier White    | Yara Black      | 2026-04-01         | 2026-12-31       | In Progress    | \$500,000      | Low          | Low                | Internal             | Feedback surveys, Analysis tools, Implementation plan.               | Survey design, Data collection, Analysis, Implementation.                                                      | Survey response rates, Data accuracy.     | Low engagement, Poor implementation.            | Incentives, Hands-on training.              | Weekly survey updates, Monthly progress reports.         | Final implementation report, Customer satisfaction survey. | Customer feedback analysis led to product improvements.                     | Listening to customer feedback is essential for growth.                 |
| Project AO   | 041        | Legal review of contracts.                                  | Zoe Black       | Adam White      | 2026-05-01         | 2026-05-31       | Completed      | \$100,000      | Low          | Low                | Internal             | Legal team, Contracts, Review process.                               | Contract identification, Review, Approval.                                                                     | Legal team delays, Contract issues.       | Contract accuracy, Compliance issues.           | Clear contract terms, Compliance checks.    | Daily contract reviews, Weekly progress reports.         | Final contract review report.                              | Legal review identified contract risks.                                     | Clear communication and legal expertise are key to contract success.    |
| Project AP   | 042        | Employee recruitment drive.                                 | Ben White       | Chloe Black     | 2026-06-01         | 2026-07-31       | In Progress    | \$300,000      | Low          | Low                | Internal             | Recruitment ads, Interviews, Offer letters.                          | Job description, Ad campaign, Interviews, Offer letters.                                                       | Recruitment delays, Interview issues.     | Low quality candidates, Poor interview process. | Clear job descriptions, Interview training. | Weekly recruitment updates, Monthly progress reports.    | Final recruitment report, New hire onboarding.             | Recruitment drive successfully filled open positions.                       | Clear communication and a positive interview process are key.           |
| Project AQ   | 043        | Product development for a new line of goods.                | Dan Black       | Eve White       | 2026-08-01         | 2026-11-30       | On Hold        | \$1,600,000    | High         | High               | Internal             | Raw materials, Manufacturing equipment, Design team.                 | Design, Prototyping, Manufacturing, Distribution.                                                              | Material scarcity, Equipment failure.     | Quality control, Safety concerns.               | Alternative materials, Safety protocols.    | Regular design meetings, Monthly progress reports.       | Quarterly reports, Final product launch.                   | Project is on hold due to funding issues.                                   | Collaboration and innovation are key to R&D success.                    |
| Project AR   | 044        | Website security audit.                                     | Frank White     | Grace Black     | 2026-09-01         | 2026-09-30       | Completed      | \$250,000      | Low          | Low                | Internal             | Audit team, Audit tools, Website data.                               | Audit planning, Data collection, Analysis, Reporting.                                                          | Audit team delays, Data access issues.    | Website downtime, Security vulnerabilities.     | Staging environment, Security audits.       | Weekly audit meetings, Monthly progress reports.         | Final security audit report, Recommendations.              | Security audit identified vulnerabilities.                                  | Regular security audits are essential for website safety.               |
| Project AS   | 045        | Supply chain diversification.                               | Henry Black     | Ivy White       | 2026-10-01         | 2026-11-30       | In Progress    | \$1,400,000    | High         | High               | Internal             | Supplier selection, Contract negotiation, Partnership agreement.     | Supplier identification, Request for proposal, Contract negotiation, Agreement signing.                        | Supplier delays, Contract issues.         | Quality control, Communication gaps.            | Alternative suppliers, Contract clauses.    | Regular supplier meetings, Monthly progress reports.     | Quarterly reports, Final diversification report.           | Project is on hold due to market volatility.                                | Transparency and collaboration are key to supply chain success.         |
| Project AT   | 046        | Employee training on new software.                          | Jack Gray       | Karen White     | 2026-11-01         | 2026-11-30       | Completed      | \$200,000      | Low          | Low                | Internal             | Training modules, Role-playing exercises, Assessment tools.          | Program development, Pilot testing, Full-scale implementation, Evaluation.                                     | Employee resistance, Lack of resources.   | Low participation, Negative feedback.           | Incentives, Hands-on training.              | Weekly training sessions, Monthly progress reports.      | Final evaluation report, Post-training survey.             | Training program improved employee software skills.                         | Investment in employee development pays off in the long run.            |
| Project AU   | 047        | Product launch in a new market.                             | Liam White      | Mia Black       | 2026-12-01         | 2027-03-31       | In Progress    | \$1,300,000    | High         | High               | External             | Marketing campaign, Sales team, Distribution channels.               | Market research, Strategy development, Campaign execution, Sales tracking.                                     | Market competition, Cultural differences. | Low sales, Negative feedback.                   | Local marketing, Cultural adaptation.       | Daily sales reports, Weekly marketing updates.           | Bi-weekly reports, Mid-launch review.                      | Product launch in new market is showing potential.                          | Local market understanding and cultural sensitivity are crucial.        |
| Project AV   | 048        | Facility expansion project.                                 | Noah Black      | Oliver White    | 2027-01-01         | 2027-12-31       | On Hold        | \$2,200,000    | High         | High               | Internal             | New building, Equipment, Staffing.                                   | Site selection, Design, Construction, Equipment installation, Staffing.                                        | Construction delays, Equipment issues.    | Facility downtime, Safety concerns.             | Contingency plan, Safety protocols.         | Regular construction meetings, Monthly progress reports. | Quarterly reports, Final facility report.                  | Project is on hold due to budget constraints.                               | Thorough planning and risk management are crucial for success.          |
| Project AW   | 049        | Customer feedback analysis and implementation.              | Peter White     | Quinn Black     | 2027-02-01         | 2027-12-31       | In Progress    | \$500,000      | Low          | Low                | Internal             | Feedback surveys, Analysis tools, Implementation plan.               | Survey design, Data collection, Analysis, Implementation.                                                      | Survey response rates, Data accuracy.     | Low engagement, Poor implementation.            | Incentives, Hands-on training.              | Weekly survey updates, Monthly progress reports.         | Final implementation report, Customer satisfaction survey. | Customer feedback analysis led to product improvements.                     | Listening to customer feedback is essential for growth.                 |
| Project AX   | 050        | Legal review of contracts.                                  | Rachel Black    | Sam White       | 2027-03-01         | 2027-03-31       | Completed      | \$100,000      | Low          | Low                | Internal             | Legal team, Contracts, Review process                                |                                                                                                                |                                           |                                                 |                                             |                                                          |                                                            |                                                                             |                                                                         |
