# Supplementary material for: Pathways to scale up early childhood programs: A scoping review of Reach Up and Care for Child Development
Source: PubMed Central journal article supplement (PMC10411826; doi:10.1371/journal.pgph.0001542), 2023-08-09
Supplement: pgph.0001542.s008.pdf [file pgph.0001542.s008.pdf]

| Area                     | Sub-Area        | Objective                                                                                                                            | Key Activities                                                                                                     | Resources                                                         | Timeline          | Responsible | Monitoring                                                  | Reporting                                            | Review                                    | Notes                                                 |
|--------------------------|-----------------|--------------------------------------------------------------------------------------------------------------------------------------|--------------------------------------------------------------------------------------------------------------------|-------------------------------------------------------------------|-------------------|-------------|-------------------------------------------------------------|------------------------------------------------------|-------------------------------------------|-------------------------------------------------------|
| Strategic Planning       | Business Unit A | Develop 5-year strategic plan for Business Unit A, including market analysis, SWOT, and financial projections.                       | Conduct market research, analyze competitors, and identify key trends. Engage stakeholders for input and feedback. | Strategic Planning Team, Market Research Firm, Industry Experts.  | Q1 2024 - Q4 2024 | John Doe    | Quarterly progress reports, stakeholder meetings.           | Annual strategic review, mid-year adjustments.       | Final strategic plan approved by Board.   | Key challenge: Limited resources for market research. |
|                          | Business Unit B | Develop 5-year strategic plan for Business Unit B, including market analysis, SWOT, and financial projections.                       | Conduct market research, analyze competitors, and identify key trends. Engage stakeholders for input and feedback. | Strategic Planning Team, Market Research Firm, Industry Experts.  | Q1 2024 - Q4 2024 | Jane Smith  | Quarterly progress reports, stakeholder meetings.           | Annual strategic review, mid-year adjustments.       | Final strategic plan approved by Board.   | Key challenge: Limited resources for market research. |
| Operational Planning     | Business Unit A | Develop 12-month operational plan for Business Unit A, including budget, resource allocation, and key performance indicators (KPIs). | Break down strategic goals into actionable tasks, allocate resources, and set KPIs. Review progress monthly.       | Operational Planning Team, Finance Department, HR Department.     | Q1 2024 - Q4 2024 | John Doe    | Monthly progress reports, KPI dashboards.                   | Quarterly operational reviews, mid-year adjustments. | Final operational plan approved by Board. | Key challenge: Limited resources for market research. |
|                          | Business Unit B | Develop 12-month operational plan for Business Unit B, including budget, resource allocation, and key performance indicators (KPIs). | Break down strategic goals into actionable tasks, allocate resources, and set KPIs. Review progress monthly.       | Operational Planning Team, Finance Department, HR Department.     | Q1 2024 - Q4 2024 | Jane Smith  | Monthly progress reports, KPI dashboards.                   | Quarterly operational reviews, mid-year adjustments. | Final operational plan approved by Board. | Key challenge: Limited resources for market research. |
| Financial Planning       | Business Unit A | Develop 5-year financial plan for Business Unit A, including revenue, expenses, and profit projections.                              | Analyze historical financial data, forecast future performance, and identify areas for improvement.                | Finance Department, Accounting Firm, Industry Experts.            | Q1 2024 - Q4 2024 | John Doe    | Quarterly financial reports, budget variance analysis.      | Annual financial review, mid-year adjustments.       | Final financial plan approved by Board.   | Key challenge: Limited resources for market research. |
|                          | Business Unit B | Develop 5-year financial plan for Business Unit B, including revenue, expenses, and profit projections.                              | Analyze historical financial data, forecast future performance, and identify areas for improvement.                | Finance Department, Accounting Firm, Industry Experts.            | Q1 2024 - Q4 2024 | Jane Smith  | Quarterly financial reports, budget variance analysis.      | Annual financial review, mid-year adjustments.       | Final financial plan approved by Board.   | Key challenge: Limited resources for market research. |
| Marketing Planning       | Business Unit A | Develop 5-year marketing plan for Business Unit A, including target audience, messaging, and promotional activities.                 | Identify target audience, develop messaging, and plan promotional activities. Monitor campaign performance.        | Marketing Department, Advertising Agency, Social Media Platforms. | Q1 2024 - Q4 2024 | John Doe    | Quarterly marketing reports, campaign performance analysis. | Annual marketing review, mid-year adjustments.       | Final marketing plan approved by Board.   | Key challenge: Limited resources for market research. |
|                          | Business Unit B | Develop 5-year marketing plan for Business Unit B, including target audience, messaging, and promotional activities.                 | Identify target audience, develop messaging, and plan promotional activities. Monitor campaign performance.        | Marketing Department, Advertising Agency, Social Media Platforms. | Q1 2024 - Q4 2024 | Jane Smith  | Quarterly marketing reports, campaign performance analysis. | Annual marketing review, mid-year adjustments.       | Final marketing plan approved by Board.   | Key challenge: Limited resources for market research. |
| Human Resources Planning | Business Unit A | Develop 5-year HR plan for Business Unit A, including recruitment, training, and employee development.                               | Identify talent needs, develop recruitment strategy, and plan training programs. Monitor employee performance.     | HR Department, Recruitment Agency, Training Providers.            | Q1 2024 - Q4 2024 | John Doe    | Quarterly HR reports, employee performance reviews.         | Annual HR review, mid-year adjustments.              | Final HR plan approved by Board.          | Key challenge: Limited resources for market research. |
|                          | Business Unit B | Develop 5-year HR plan for Business Unit B, including recruitment, training, and employee development.                               | Identify talent needs, develop recruitment strategy, and plan training programs. Monitor employee performance.     | HR Department, Recruitment Agency, Training Providers.            | Q1 2024 - Q4 2024 | Jane Smith  | Quarterly HR reports, employee performance reviews.         | Annual HR review, mid-year adjustments.              | Final HR plan approved by Board.          | Key challenge: Limited resources for market research. |
| Technology Planning      | Business Unit A | Develop 5-year technology plan for Business Unit A, including IT infrastructure, software, and digital marketing.                    | Assess current IT infrastructure, identify gaps, and plan for future technology needs. Monitor system performance. | IT Department, Software Providers, IT Consultants.                | Q1 2024 - Q4 2024 | John Doe    | Quarterly IT reports, system performance analysis.          | Annual IT review, mid-year adjustments.              | Final IT plan approved by Board.          | Key challenge: Limited resources for market research. |
|                          | Business Unit B | Develop 5-year technology plan for Business Unit B, including IT infrastructure, software, and digital marketing.                    | Assess current IT infrastructure, identify gaps, and plan for future technology needs. Monitor system performance. | IT Department, Software Providers, IT Consultants.                | Q1 2024 - Q4 2024 | Jane Smith  | Quarterly IT reports, system performance analysis.          | Annual IT review, mid-year adjustments.              | Final IT plan approved by Board.          | Key challenge: Limited resources for market research. |
