# Supplementary material for: Pathways to scale up early childhood programs: A scoping review of Reach Up and Care for Child Development
Source: PubMed Central journal article supplement (PMC10411826; doi:10.1371/journal.pgph.0001542), 2023-08-09
Supplement: pgph.0001542.s009.pdf [file pgph.0001542.s009.pdf]

| Area                   | Project/Program         | Objectives                                                                                                                                                                         | Priority | Responsibility               | Actions                                                                                                                                             | Progress | Timeline          | Resources | Dependencies/Link                                                                  | Status    | Project/Program | Notes     |                                                                                                                          |
|------------------------|-------------------------|------------------------------------------------------------------------------------------------------------------------------------------------------------------------------------|----------|------------------------------|-----------------------------------------------------------------------------------------------------------------------------------------------------|----------|-------------------|-----------|------------------------------------------------------------------------------------|-----------|-----------------|-----------|--------------------------------------------------------------------------------------------------------------------------|
| Business Development   | New Market Expansion    | Identify and evaluate new market opportunities in emerging markets, focusing on digital marketing and e-commerce. The goal is to increase sales and market share in these regions. | High     | Marketing Department         | Conduct market research, identify key players, and develop a go-to-market strategy. Implement digital marketing campaigns and e-commerce platforms. | On Track | Q3 2023 - Q4 2023 | \$500,000 | Market research, digital marketing tools, e-commerce platform.                     | Completed | Completed       | Completed | Market research and digital marketing campaigns are well advanced. E-commerce platform is being tested.                  |
|                        |                         | Establish a strong brand presence in emerging markets, focusing on local partnerships and community engagement. The goal is to build trust and loyalty among local consumers.      | High     | Marketing Department         | Identify local partners and influencers, develop community engagement programs, and launch localized marketing campaigns.                           | On Track | Q3 2023 - Q4 2023 | \$300,000 | Local partnerships, community engagement programs, localized marketing campaigns.  | Completed | Completed       | Completed | Local partnerships and community engagement programs are well advanced. Localized marketing campaigns are being tested.  |
| Operational Efficiency | Process Automation      | Streamline internal processes and reduce manual tasks using automation tools. The goal is to improve efficiency and reduce errors.                                                 | Medium   | IT Department                | Identify areas for automation, select and implement automation tools, and train staff on the new tools.                                             | On Track | Q1 2023 - Q2 2023 | \$200,000 | Automation tools, IT staff, training resources.                                    | Completed | Completed       | Completed | Automation tools are being implemented across various departments. Staff training is well advanced.                      |
|                        |                         | Optimize resource allocation and improve workflow efficiency. The goal is to reduce costs and increase productivity.                                                               | Medium   | Operations Department        | Conduct a process audit, identify inefficiencies, and implement workflow optimization measures.                                                     | On Track | Q1 2023 - Q2 2023 | \$150,000 | Process audit, workflow optimization measures, resource allocation tools.          | Completed | Completed       | Completed | Process audit and workflow optimization measures are well advanced. Resource allocation tools are being tested.          |
| Customer Satisfaction  | Service Improvement     | Improve customer service and reduce response times. The goal is to increase customer satisfaction and loyalty.                                                                     | High     | Customer Service Department  | Train customer service staff, implement self-service options, and monitor customer feedback.                                                        | On Track | Q1 2023 - Q2 2023 | \$100,000 | Customer service staff, self-service options, customer feedback tools.             | Completed | Completed       | Completed | Customer service staff training is well advanced. Self-service options are being tested.                                 |
|                        |                         | Enhance the customer experience and increase repeat business. The goal is to increase customer retention and lifetime value.                                                       | High     | Customer Service Department  | Implement loyalty programs, personalize customer interactions, and provide exceptional service.                                                     | On Track | Q1 2023 - Q2 2023 | \$100,000 | Loyalty programs, personalized customer interactions, exceptional service.         | Completed | Completed       | Completed | Loyalty programs and personalized customer interactions are well advanced. Exceptional service is being tested.          |
| Financial Performance  | Revenue Growth          | Increase revenue and profitability through new product lines and market expansion. The goal is to achieve a 10% increase in revenue.                                               | High     | Finance Department           | Develop new product lines, expand into new markets, and optimize pricing strategies.                                                                | On Track | Q1 2023 - Q2 2023 | \$800,000 | New product lines, new markets, pricing strategies.                                | Completed | Completed       | Completed | New product lines and market expansion are well advanced. Pricing strategies are being tested.                           |
|                        |                         | Reduce costs and improve operational efficiency. The goal is to achieve a 5% reduction in costs.                                                                                   | Medium   | Finance Department           | Identify cost-saving opportunities, negotiate better terms with suppliers, and optimize operational processes.                                      | On Track | Q1 2023 - Q2 2023 | \$200,000 | Cost-saving opportunities, supplier negotiations, operational optimization.        | Completed | Completed       | Completed | Cost-saving opportunities and supplier negotiations are well advanced. Operational optimization is being tested.         |
| Human Resources        | Talent Development      | Invest in employee training and development to improve skills and productivity. The goal is to increase employee performance and retention.                                        | High     | HR Department                | Identify training needs, develop training programs, and provide ongoing support and mentorship.                                                     | On Track | Q1 2023 - Q2 2023 | \$300,000 | Training programs, ongoing support, mentorship.                                    | Completed | Completed       | Completed | Training programs and ongoing support are well advanced. Mentorship is being tested.                                     |
|                        |                         | Attract and retain top talent to drive business growth. The goal is to increase the quality and quantity of the workforce.                                                         | High     | HR Department                | Develop recruitment strategies, improve the employee experience, and offer competitive compensation.                                                | On Track | Q1 2023 - Q2 2023 | \$200,000 | Recruitment strategies, employee experience, competitive compensation.             | Completed | Completed       | Completed | Recruitment strategies and employee experience improvements are well advanced. Competitive compensation is being tested. |
| Marketing              | Brand Awareness         | Build a strong brand identity and increase brand awareness. The goal is to increase brand recognition and loyalty.                                                                 | High     | Marketing Department         | Develop brand identity, launch marketing campaigns, and engage with customers on social media.                                                      | On Track | Q1 2023 - Q2 2023 | \$400,000 | Brand identity, marketing campaigns, social media engagement.                      | Completed | Completed       | Completed | Brand identity and marketing campaigns are well advanced. Social media engagement is being tested.                       |
|                        |                         | Engage with customers and build a loyal following. The goal is to increase customer loyalty and repeat business.                                                                   | High     | Marketing Department         | Implement loyalty programs, provide exceptional customer service, and engage with customers on social media.                                        | On Track | Q1 2023 - Q2 2023 | \$200,000 | Loyalty programs, exceptional customer service, social media engagement.           | Completed | Completed       | Completed | Loyalty programs and exceptional customer service are well advanced. Social media engagement is being tested.            |
| Operational Efficiency | Supply Chain Management | Optimize the supply chain and reduce costs. The goal is to improve supply chain efficiency and reduce costs.                                                                       | Medium   | Operations Department        | Identify supply chain inefficiencies, negotiate better terms with suppliers, and optimize inventory levels.                                         | On Track | Q1 2023 - Q2 2023 | \$300,000 | Supply chain inefficiencies, supplier negotiations, inventory optimization.        | Completed | Completed       | Completed | Supply chain inefficiencies and supplier negotiations are well advanced. Inventory optimization is being tested.         |
|                        |                         | Improve inventory management and reduce stockouts. The goal is to increase inventory turnover and reduce stockouts.                                                                | Medium   | Operations Department        | Implement inventory management systems, improve forecasting, and reduce stockouts.                                                                  | On Track | Q1 2023 - Q2 2023 | \$200,000 | Inventory management systems, forecasting, stockout reduction.                     | Completed | Completed       | Completed | Inventory management systems and forecasting are well advanced. Stockout reduction is being tested.                      |
| Customer Satisfaction  | Product Quality         | Ensure product quality and consistency. The goal is to increase customer satisfaction and loyalty.                                                                                 | High     | Quality Assurance Department | Implement quality control measures, conduct regular audits, and provide feedback to production teams.                                               | On Track | Q1 2023 - Q2 2023 | \$150,000 | Quality control measures, regular audits, feedback to production teams.            | Completed | Completed       | Completed | Quality control measures and regular audits are well advanced. Feedback to production teams is being tested.             |
|                        |                         | Reduce product defects and improve product reliability. The goal is to increase product reliability and reduce returns.                                                            | High     | Quality Assurance Department | Identify product defects, improve production processes, and provide training to production teams.                                                   | On Track | Q1 2023 - Q2 2023 | \$150,000 | Product defects, production processes, training to production teams.               | Completed | Completed       | Completed | Product defects and production processes are well advanced. Training to production teams is being tested.                |
| Financial Performance  | Cost Reduction          | Reduce operating costs and improve profitability. The goal is to achieve a 5% reduction in costs.                                                                                  | Medium   | Finance Department           | Identify cost-saving opportunities, negotiate better terms with suppliers, and optimize operational processes.                                      | On Track | Q1 2023 - Q2 2023 | \$200,000 | Cost-saving opportunities, supplier negotiations, operational optimization.        | Completed | Completed       | Completed | Cost-saving opportunities and supplier negotiations are well advanced. Operational optimization is being tested.         |
|                        |                         | Improve cash flow and working capital. The goal is to increase cash flow and working capital.                                                                                      | Medium   | Finance Department           | Optimize accounts receivable, negotiate better terms with suppliers, and improve inventory management.                                              | On Track | Q1 2023 - Q2 2023 | \$150,000 | Accounts receivable optimization, supplier negotiations, inventory management.     | Completed | Completed       | Completed | Accounts receivable optimization and supplier negotiations are well advanced. Inventory management is being tested.      |
| Human Resources        | Employee Engagement     | Improve employee engagement and productivity. The goal is to increase employee performance and retention.                                                                          | High     | HR Department                | Implement employee engagement programs, provide ongoing support and mentorship, and recognize employee achievements.                                | On Track | Q1 2023 - Q2 2023 | \$300,000 | Employee engagement programs, ongoing support, mentorship, recognition.            | Completed | Completed       | Completed | Employee engagement programs and ongoing support are well advanced. Mentorship and recognition are being tested.         |
|                        |                         | Attract and retain top talent to drive business growth. The goal is to increase the quality and quantity of the workforce.                                                         | High     | HR Department                | Develop recruitment strategies, improve the employee experience, and offer competitive compensation.                                                | On Track | Q1 2023 - Q2 2023 | \$200,000 | Recruitment strategies, employee experience, competitive compensation.             | Completed | Completed       | Completed | Recruitment strategies and employee experience improvements are well advanced. Competitive compensation is being tested. |
| Marketing              | Sales Growth            | Increase sales and revenue through new product lines and market expansion. The goal is to achieve a 10% increase in sales.                                                         | High     | Marketing Department         | Develop new product lines, expand into new markets, and optimize pricing strategies.                                                                | On Track | Q1 2023 - Q2 2023 | \$800,000 | New product lines, new markets, pricing strategies.                                | Completed | Completed       | Completed | New product lines and market expansion are well advanced. Pricing strategies are being tested.                           |
|                        |                         | Reduce sales and marketing costs. The goal is to achieve a 5% reduction in costs.                                                                                                  | Medium   | Marketing Department         | Identify cost-saving opportunities, negotiate better terms with suppliers, and optimize marketing campaigns.                                        | On Track | Q1 2023 - Q2 2023 | \$200,000 | Cost-saving opportunities, supplier negotiations, marketing campaign optimization. | Completed | Completed       | Completed | Cost-saving opportunities and supplier negotiations are well advanced. Marketing campaign optimization is being tested.  |
