# Supplementary material for: Pathways to scale up early childhood programs: A scoping review of Reach Up and Care for Child Development
Source: PubMed Central journal article supplement (PMC10411826; doi:10.1371/journal.pgph.0001542), 2023-08-09
Supplement: pgph.0001542.s010.pdf [file pgph.0001542.s010.pdf]

S6 Table. Implementation Strategies Screening by Building

| Implementation Strategies                                              | Program Emergence         |                     |                |                 |                             | Intersectorality               |                                |                          |                          | Intervention Characteristics |                       |                      |                    |                 |           | Workforce            |                                 |                     |                       |                               | Training         |                        |           |                           |                       | Monitoring System               |                |                      |                     |                 |                      |                       |                                    |                          |                     |                     |                    |                |                |                |                |                |                |     |
|------------------------------------------------------------------------|---------------------------|---------------------|----------------|-----------------|-----------------------------|--------------------------------|--------------------------------|--------------------------|--------------------------|------------------------------|-----------------------|----------------------|--------------------|-----------------|-----------|----------------------|---------------------------------|---------------------|-----------------------|-------------------------------|------------------|------------------------|-----------|---------------------------|-----------------------|---------------------------------|----------------|----------------------|---------------------|-----------------|----------------------|-----------------------|------------------------------------|--------------------------|---------------------|---------------------|--------------------|----------------|----------------|----------------|----------------|----------------|----------------|-----|
|                                                                        | Governance and Leadership | Multilevel Networks | Funding        | Scaling Process | Integration into ECD system | Coordination and Communication | Intersectional Characteristics | Intersectional Targeting | Intersectional Workforce | Delivery Sites and Assets    | Intervention Delivery | Intervention Setting | Dose and Frequency | Design Approach | Materials | Caregiver Engagement | Segmented by program activities | Responsive Teaching | Workforce recruitment | Implementation Agent Training | Job Satisfaction | Contractual Conditions | Classroom | Workforce Characteristics | Community Integration | Training analysis and protocols | Training Sites | Continuing Education | Training Leadership | Training Design | Institutionalization | Supportive Monitoring | Standardized Data Collection Tools | Informed Decision Making | Supervisor Training | Supervisor Feedback | Impact Measurement |                |                |                |                |                |                |     |
| <b>CCD</b>                                                             |                           |                     |                |                 |                             |                                |                                |                          |                          |                              |                       |                      |                    |                 |           |                      |                                 |                     |                       |                               |                  |                        |           |                           |                       |                                 |                |                      |                     |                 |                      |                       |                                    |                          |                     |                     |                    |                |                |                |                |                |                |     |
| <b>African Region</b>                                                  |                           |                     |                |                 |                             |                                |                                |                          |                          |                              |                       |                      |                    |                 |           |                      |                                 |                     |                       |                               |                  |                        |           |                           |                       |                                 |                |                      |                     |                 |                      |                       |                                    |                          |                     |                     |                    |                |                |                |                |                |                |     |
| Kenya: Smart Start Siaya County                                        | Yes                       | Yes                 | Yes            | Yes             | Yes                         | Yes                            | No                             | Yes                      | Yes                      | Yes                          | Yes                   | Not identified       | Yes                | Yes             | Yes       | No                   | Not identified                  | Yes                 | Yes                   | Yes                           | Yes              | Not identified         | Yes       | Yes                       | Not identified        | Not identified                  | Yes            | Yes                  | Yes                 | Yes             | Yes                  | Yes                   | Yes                                | Yes                      | Yes                 | Yes                 | Not identified     | Yes            |                |                |                |                |                |     |
| Kenya: Home Care                                                       | Yes                       | Yes                 | Yes            | Yes             | Yes                         | Not identified                 | Yes                            | No                       | Yes                      | Not identified               | Yes                   | Yes                  | Yes                | Yes             | Yes       | Yes                  | Yes                             | Yes                 | Yes                   | Yes                           | Yes              | Yes                    | Yes       | Yes                       | Yes                   | Yes                             | Yes            | Yes                  | Yes                 | No              | Yes                  | Yes                   | Yes                                | Yes                      | Yes                 | Yes                 | Yes                | Not identified | Yes            |                |                |                |                |     |
| Mali: CCD                                                              | Yes                       | Yes                 | Yes            | Yes             | No                          | Yes                            | Yes                            | Yes                      | Yes                      | Yes                          | Yes                   | Yes                  | Yes                | Yes             | Yes       | Yes                  | Yes                             | Yes                 | Yes                   | Yes                           | Yes              | Yes                    | Yes       | Yes                       | Yes                   | Yes                             | Yes            | Yes                  | No                  | Yes             | Yes                  | Yes                   | Yes                                | Yes                      | Yes                 | Yes                 | Yes                | Not identified | Yes            |                |                |                |                |     |
| Mozambique: Nurturing Care Collaboration                               | Yes                       | Yes                 | Yes            | No              | Yes                         | Yes                            | Yes                            | No                       | Yes                      | Yes                          | Yes                   | Yes                  | Yes                | Yes             | Yes       | Not identified       | Yes                             | Not identified      | Yes                   | Yes                           | Yes              | Yes                    | Yes       | Yes                       | Yes                   | Yes                             | Yes            | Yes                  | Yes                 | Yes             | Yes                  | Yes                   | Yes                                | Yes                      | Yes                 | Yes                 | Yes                | Yes            | Not identified | Yes            |                |                |                |     |
| Rwanda: Siga Muryaga                                                   | Yes                       | Yes                 | Yes            | Yes             | No                          | Not identified                 | Yes                            | Yes                      | No                       | No                           | Yes                   | Yes                  | Yes                | Yes             | Yes       | Yes                  | Yes                             | Yes                 | Yes                   | Yes                           | Yes              | Yes                    | Yes       | Yes                       | Yes                   | Yes                             | Yes            | Yes                  | Yes                 | No              | Yes                  | Yes                   | Yes                                | Yes                      | Yes                 | Yes                 | Yes                | Yes            | Not identified | Yes            |                |                |                |     |
| Tanzania: Integrated health, nutrition, responsive stimulation package | Yes                       | Not identified      | Not identified | No              | Not identified              | Not identified                 | Yes                            | Yes                      | No                       | Yes                          | Yes                   | Yes                  | Yes                | Yes             | Yes       | Not identified       | Yes                             | Yes                 | Yes                   | Yes                           | Yes              | Yes                    | Yes       | Yes                       | Yes                   | Yes                             | Yes            | Yes                  | Yes                 | Yes             | No                   | Yes                   | Yes                                | Yes                      | Yes                 | Yes                 | Yes                | Yes            | Not identified | Yes            |                |                |                |     |
| <b>Americas Region</b>                                                 |                           |                     |                |                 |                             |                                |                                |                          |                          |                              |                       |                      |                    |                 |           |                      |                                 |                     |                       |                               |                  |                        |           |                           |                       |                                 |                |                      |                     |                 |                      |                       |                                    |                          |                     |                     |                    |                |                |                |                |                |                |     |
| Brazil: Criança Feliz                                                  | Yes                       | Yes                 | Yes            | Yes             | Yes                         | Yes                            | No                             | Yes                      | No                       | No                           | Yes                   | Yes                  | Yes                | Yes             | Yes       | Yes                  | Not identified                  | No                  | Not identified        | Yes                           | Yes              | Yes                    | Yes       | Yes                       | Yes                   | Yes                             | Yes            | Yes                  | Yes                 | Yes             | Yes                  | Yes                   | Yes                                | Yes                      | Yes                 | Yes                 | Yes                | Yes            | Yes            | Not identified | Yes            |                |                |     |
| <b>Eastern Mediterranean Region</b>                                    |                           |                     |                |                 |                             |                                |                                |                          |                          |                              |                       |                      |                    |                 |           |                      |                                 |                     |                       |                               |                  |                        |           |                           |                       |                                 |                |                      |                     |                 |                      |                       |                                    |                          |                     |                     |                    |                |                |                |                |                |                |     |
| Pakistan: PEES                                                         | Not identified            | Yes                 | Yes            | Yes             | Yes                         | Yes                            | Yes                            | No                       | Yes                      | Not identified               | Yes                   | Yes                  | Yes                | Yes             | Yes       | Yes                  | Yes                             | Yes                 | Yes                   | Yes                           | Yes              | Yes                    | Yes       | Yes                       | Yes                   | Yes                             | Yes            | Yes                  | Yes                 | No              | Yes                  | Yes                   | Yes                                | Yes                      | Yes                 | Yes                 | Yes                | Yes            | Yes            | Not identified | Yes            |                |                |     |
| Pakistan: SPRING                                                       | Not identified            | Yes                 | Yes            | Yes             | Yes                         | Yes                            | Yes                            | No                       | Yes                      | No                           | Yes                   | Yes                  | Yes                | Yes             | Yes       | Yes                  | Yes                             | Yes                 | Yes                   | Yes                           | Yes              | Yes                    | Yes       | Yes                       | Yes                   | Yes                             | Yes            | Yes                  | Yes                 | Yes             | Yes                  | Yes                   | Yes                                | Yes                      | Yes                 | Yes                 | Yes                | Yes            | Yes            | Not identified | Yes            |                |                |     |
| <b>Europe Region</b>                                                   |                           |                     |                |                 |                             |                                |                                |                          |                          |                              |                       |                      |                    |                 |           |                      |                                 |                     |                       |                               |                  |                        |           |                           |                       |                                 |                |                      |                     |                 |                      |                       |                                    |                          |                     |                     |                    |                |                |                |                |                |                |     |
| Turkey: Care for Development                                           | No                        | No                  | Yes            | No              | Yes                         | Not identified                 | Yes                            | Yes                      | Yes                      | Yes                          | Yes                   | Yes                  | Yes                | Yes             | Yes       | No                   | No                              | No                  | Yes                   | Yes                           | Yes              | Yes                    | Yes       | No                        | No                    | Not identified                  | Not identified | Not identified       | Not identified      | Yes             | No                   | Not identified        | Not identified                     | Not identified           | Not identified      | Yes                 | No                 | Not identified | Not identified | Not identified | Not identified | Yes            |                |     |
| Kazakhstan: Better Parenting Initiative                                | Yes                       | Yes                 | Yes            | Yes             | Yes                         | Yes                            | Yes                            | Yes                      | Yes                      | Yes                          | Yes                   | Yes                  | Yes                | Yes             | Yes       | Yes                  | Yes                             | Yes                 | Yes                   | Yes                           | Yes              | Yes                    | Yes       | Yes                       | Yes                   | Yes                             | Yes            | Yes                  | Yes                 | Yes             | Yes                  | Yes                   | Yes                                | Yes                      | Yes                 | Yes                 | Yes                | Yes            | Yes            | Yes            | Not identified | Yes            |                |     |
| Tajikistan: MCI with CCD                                               | Yes                       | Yes                 | Yes            | Yes             | Yes                         | Yes                            | Yes                            | No                       | Yes                      | Yes                          | Yes                   | Yes                  | Yes                | Yes             | Yes       | Not identified       | Not identified                  | Not identified      | Yes                   | Yes                           | Yes              | Yes                    | Yes       | Yes                       | Yes                   | Yes                             | Yes            | Yes                  | Yes                 | Yes             | Yes                  | Yes                   | Yes                                | Yes                      | Yes                 | Yes                 | Yes                | Yes            | Yes            | Yes            | Not identified | Yes            |                |     |
| Uganda: Ripe: MCI with CCD                                             | Yes                       | Yes                 | Yes            | Yes             | Yes                         | Yes                            | Yes                            | Yes                      | Yes                      | Yes                          | Yes                   | Yes                  | Yes                | Yes             | Yes       | Not identified       | Not identified                  | Not identified      | Yes                   | Yes                           | Yes              | Yes                    | Yes       | Yes                       | Yes                   | Yes                             | Yes            | Yes                  | Yes                 | Yes             | Yes                  | Yes                   | Yes                                | Yes                      | Yes                 | Yes                 | Yes                | Yes            | Yes            | Yes            | Not identified | Yes            |                |     |
| <b>South-East Asia Region</b>                                          |                           |                     |                |                 |                             |                                |                                |                          |                          |                              |                       |                      |                    |                 |           |                      |                                 |                     |                       |                               |                  |                        |           |                           |                       |                                 |                |                      |                     |                 |                      |                       |                                    |                          |                     |                     |                    |                |                |                |                |                |                |     |
| India: SPRING                                                          | Yes                       | Yes                 | Yes            | No              | Yes                         | Not identified                 | Yes                            | No                       | Yes                      | No                           | Yes                   | Yes                  | Yes                | Yes             | Yes       | Not identified       | Yes                             | Yes                 | Yes                   | Yes                           | Yes              | Yes                    | Yes       | Yes                       | Yes                   | Yes                             | Yes            | Yes                  | Yes                 | Yes             | Yes                  | Yes                   | Yes                                | Yes                      | Yes                 | Yes                 | Yes                | Yes            | Yes            | Yes            | Not identified | Yes            |                |     |
| India: Project Gyan Smart                                              | Yes                       | Yes                 | Yes            | No              | No                          | Not identified                 | Yes                            | No                       | No                       | No                           | Yes                   | Yes                  | Yes                | Yes             | Yes       | Yes                  | Yes                             | Yes                 | Yes                   | Yes                           | Yes              | Yes                    | Yes       | Yes                       | Yes                   | Yes                             | Yes            | Yes                  | Yes                 | Yes             | Yes                  | Yes                   | Yes                                | Yes                      | Yes                 | Yes                 | Yes                | Yes            | Yes            | Yes            | Not identified | Yes            |                |     |
| <b>Western Pacific Region</b>                                          |                           |                     |                |                 |                             |                                |                                |                          |                          |                              |                       |                      |                    |                 |           |                      |                                 |                     |                       |                               |                  |                        |           |                           |                       |                                 |                |                      |                     |                 |                      |                       |                                    |                          |                     |                     |                    |                |                |                |                |                |                |     |
| Vietnam: Learning Clubs                                                | Not identified            | Yes                 | Yes            | Yes             | Yes                         | Not identified                 | Yes                            | No                       | Yes                      | Yes                          | Yes                   | Yes                  | Yes                | Yes             | Yes       | Yes                  | Yes                             | Yes                 | Yes                   | Yes                           | Yes              | Yes                    | Yes       | Yes                       | Yes                   | Yes                             | Yes            | Yes                  | Yes                 | Yes             | Yes                  | Yes                   | Yes                                | Yes                      | Yes                 | Yes                 | Yes                | Yes            | Yes            | Yes            | Yes            | Not identified | Yes            |     |
| China: MCI                                                             | Not identified            | Not identified      | Yes            | Yes             | No                          | Not identified                 | No                             | No                       | Not identified           | Not identified               | Not identified        | Not identified       | Yes                | Yes             | Yes       | Yes                  | Yes                             | Yes                 | Yes                   | Yes                           | Yes              | Yes                    | Yes       | Yes                       | Yes                   | Yes                             | Yes            | Yes                  | Yes                 | Yes             | Yes                  | Yes                   | Yes                                | Yes                      | Yes                 | Yes                 | Yes                | Yes            | Yes            | Yes            | Yes            | Not identified | Yes            |     |
| China: ECD                                                             | Not identified            | Yes                 | Yes            | Yes             | Yes                         | Yes                            | Yes                            | Yes                      | No                       | Yes                          | Yes                   | Yes                  | Yes                | Yes             | Yes       | Yes                  | Yes                             | Yes                 | Yes                   | Yes                           | Yes              | Yes                    | Yes       | Yes                       | Yes                   | Yes                             | Yes            | Yes                  | Yes                 | Yes             | Yes                  | Yes                   | Yes                                | Yes                      | Yes                 | Yes                 | Yes                | Yes            | Yes            | Yes            | Yes            | Not identified | Yes            |     |
| <b>African Region</b>                                                  |                           |                     |                |                 |                             |                                |                                |                          |                          |                              |                       |                      |                    |                 |           |                      |                                 |                     |                       |                               |                  |                        |           |                           |                       |                                 |                |                      |                     |                 |                      |                       |                                    |                          |                     |                     |                    |                |                |                |                |                |                |     |
| Zimbabwe: Modified RUJ                                                 | Not identified            | Not identified      | Yes            | Not identified  | Yes                         | Not identified                 | No                             | Not identified           | Yes                      | Yes                          | Yes                   | Yes                  | Yes                | Yes             | Yes       | Not identified       | No                              | Not identified      | Yes                   | Yes                           | Yes              | Yes                    | Yes       | Yes                       | Yes                   | Yes                             | Yes            | Yes                  | Yes                 | Yes             | Yes                  | Yes                   | Yes                                | Yes                      | Yes                 | Yes                 | Yes                | Yes            | Yes            | Yes            | Yes            | Not identified | Yes            |     |
| <b>Madagascar: Early Stimulation</b>                                   |                           |                     |                |                 |                             |                                |                                |                          |                          |                              |                       |                      |                    |                 |           |                      |                                 |                     |                       |                               |                  |                        |           |                           |                       |                                 |                |                      |                     |                 |                      |                       |                                    |                          |                     |                     |                    |                |                |                |                |                |                |     |
| <b>Americas Region</b>                                                 |                           |                     |                |                 |                             |                                |                                |                          |                          |                              |                       |                      |                    |                 |           |                      |                                 |                     |                       |                               |                  |                        |           |                           |                       |                                 |                |                      |                     |                 |                      |                       |                                    |                          |                     |                     |                    |                |                |                |                |                |                |     |
| Brazil: Responsive Caring and Early Learning Program                   | Yes                       | Yes                 | Yes            | Yes             | Yes                         | Not identified                 | No                             | Yes                      | Yes                      | No                           | Yes                   | Yes                  | Yes                | Yes             | Yes       | No                   | Not identified                  | Yes                 | Yes                   | Yes                           | Yes              | Yes                    | Yes       | Yes                       | Yes                   | Yes                             | Yes            | Yes                  | Yes                 | Yes             | Yes                  | Yes                   | Yes                                | Yes                      | Yes                 | Yes                 | Yes                | Yes            | Yes            | Yes            | Yes            | Not identified | Yes            |     |
| Peru: Cuna Más                                                         | Yes                       | Yes                 | Yes            | Yes             | Yes                         | Yes                            | No                             | Yes                      | No*                      | Yes                          | Yes                   | Yes                  | Yes                | Yes             | Yes       | Yes                  | Yes                             | Yes                 | Yes                   | Yes                           | Yes              | Yes                    | Yes       | Yes                       | Yes                   | Yes                             | Yes            | Yes                  | Yes                 | Yes             | Yes                  | Yes                   | Yes                                | Yes                      | Yes                 | Yes                 | Yes                | Yes            | Yes            | Yes            | Yes            | Not identified | Yes            |     |
| Colombia: Home-Based ECD Intervention                                  | Yes                       | Yes                 | Yes            | Yes             | Yes                         | Not identified                 | Yes                            | Yes                      | No                       | Yes                          | Yes                   | Yes                  | Yes                | Yes             | Yes       | Yes                  | Yes                             | Yes                 | Yes                   | Yes                           | Yes              | Yes                    | Yes       | Yes                       | Yes                   | Yes                             | Yes            | Yes                  | Yes                 | Yes             | Yes                  | Yes                   | Yes                                | Yes                      | Yes                 | Yes                 | Yes                | Yes            | Yes            | Yes            | Yes            | Not identified | Yes            |     |
| Colombia: Enhanced FAMI                                                | Yes                       | Yes                 | Yes            | Yes             | Yes                         | Not identified                 | No                             | Yes                      | Yes                      | Yes                          | Yes                   | Yes                  | Yes                | Yes             | Yes       | Yes                  | Yes                             | Yes                 | Yes                   | Yes                           | Yes              | Yes                    | Yes       | Yes                       | Yes                   | Yes                             | Yes            | Yes                  | Yes                 | Yes             | Yes                  | Yes                   | Yes                                | Yes                      | Yes                 | Yes                 | Yes                | Yes            | Yes            | Yes            | Yes            | Not identified | Yes            |     |
| Jamaica: J_NVP                                                         | No                        | No                  | Yes            | No              | No                          | Not identified                 | Yes                            | No                       | Yes                      | No                           | Yes                   | Yes                  | Yes                | Yes             | Yes       | No                   | Yes                             | Yes                 | Yes                   | Yes                           | Yes              | Yes                    | Yes       | Yes                       | Yes                   | Yes                             | Yes            | Yes                  | Yes                 | Yes             | Yes                  | Yes                   | Yes                                | Yes                      | Yes                 | Yes                 | Yes                | Yes            | Yes            | Yes            | Yes            | Not identified | Yes            |     |
| <b>Eastern Mediterranean Region</b>                                    |                           |                     |                |                 |                             |                                |                                |                          |                          |                              |                       |                      |                    |                 |           |                      |                                 |                     |                       |                               |                  |                        |           |                           |                       |                                 |                |                      |                     |                 |                      |                       |                                    |                          |                     |                     |                    |                |                |                |                |                |                |     |
| Jordan: Modified Reach Up and Learn                                    | Yes                       | Yes                 | Yes            | Not identified  | Yes                         | Yes                            | No                             | No                       | No                       | No                           | Yes                   | Yes                  | Yes                | Yes             | Yes       | No                   | Yes                             | Yes                 | Yes                   | Yes                           | Yes              | Yes                    | Yes       | Yes                       | Yes                   | Yes                             | Yes            | Yes                  | Yes                 | Yes             | Yes                  | Yes                   | Yes                                | Yes                      | Yes                 | Yes                 | Yes                | Yes            | Yes            | Yes            | Yes            | Not identified | Yes            |     |
| Lebanon: Modified Reach Up and Learn                                   | Yes                       | Yes                 | Yes            | Not identified  | Yes                         | Yes                            | No                             | No                       | No                       | No                           | Yes                   | Yes                  | Yes                | Yes             | Yes       | Yes                  | No                              | Yes                 | Yes                   | Yes                           | Yes              | Yes                    | Yes       | Yes                       | Yes                   | Yes                             | Yes            | Yes                  | Yes                 | Yes             | Yes                  | Yes                   | Yes                                | Yes                      | Yes                 | Yes                 | Yes                | Yes            | Yes            | Yes            | Yes            | Not identified | Yes            |     |
| Syria: Modified Reach Up and Learn                                     | Yes                       | Yes                 | Yes            | Not identified  | Yes                         | Yes                            | No                             | No                       | No                       | No                           | Yes                   | Yes                  | Yes                | Yes             | Yes       | No                   | Yes                             | Yes                 | Yes                   | Yes                           | Yes              | Yes                    | Yes       | Yes                       | Yes                   | Yes                             | Yes            | Yes                  | Yes                 | Yes             | Yes                  | Yes                   | Yes                                | Yes                      | Yes                 | Yes                 | Yes                | Yes            | Yes            | Yes            | Yes            | Not identified | Yes            |     |
| <b>Western Pacific Region</b>                                          |                           |                     |                |                 |                             |                                |                                |                          |                          |                              |                       |                      |                    |                 |           |                      |                                 |                     |                       |                               |                  |                        |           |                           |                       |                                 |                |                      |                     |                 |                      |                       |                                    |                          |                     |                     |                    |                |                |                |                |                |                |     |
| Bangladesh: Integrated psychosocial stimulation and UCT                | Yes                       | Yes                 | Yes            | No              | No                          | Not identified                 | Yes                            | Yes                      | No                       | No                           | Yes                   | Yes                  | Yes                | Yes             | Yes       | Yes                  | Yes                             | Yes                 | Yes                   | Yes                           | Yes              | Yes                    | Yes       | Yes                       | Yes                   | Yes                             | Yes            | Yes                  | Yes                 | Yes             | Yes                  | Yes                   | Yes                                | Yes                      | Yes                 | Yes                 | Yes                | Yes            | Yes            | Yes            | Yes            | Yes            | Not identified | Yes |
| Bangladesh: RNEW                                                       | Yes                       | Yes                 | Yes            | No              | No                          | Not identified                 | Yes                            | Yes                      | No                       | No                           | Yes                   | Yes                  | Yes                | Yes             | Yes       | Yes                  | Yes                             | Yes                 | Yes                   | Yes                           | Yes              | Yes                    | Yes       | Yes                       | Yes                   | Yes                             | Yes            | Yes                  | Yes                 | Yes             | Yes                  | Yes                   | Yes                                | Yes                      | Yes                 | Yes                 | Yes                | Yes            | Yes            | Yes            | Yes            | Not identified | Yes            |     |
| Bangladesh: RUJ-modified                                               | Yes                       | Yes                 | Yes            | Yes             | Yes                         | Not identified                 | Yes                            | Yes                      | No                       | Yes                          | Yes                   | Yes                  | Yes                | Yes             | Yes       | Yes                  | Yes                             | Yes                 | Yes                   | Yes                           | Yes              | Yes                    | Yes       | Yes                       | Yes                   | Yes                             | Yes            | Yes                  | Yes                 | Yes             | Yes                  | Yes                   | Yes                                | Yes                      | Yes                 | Yes                 | Yes                | Yes            | Yes            | Yes            | Yes            | Not identified | Yes            |     |
| Bangladesh: Psychological Stimulation                                  | Not identified            | Yes                 | Yes            | Yes             | Yes                         | Not identified                 | Yes                            | Yes                      | No                       | Yes                          | Yes                   | Yes                  | Yes                | Yes             | Yes       | Yes                  | Yes                             | Yes                 | Yes                   | Yes                           | Yes              | Yes                    | Yes       | Yes                       | Yes                   | Yes                             | Yes            | Yes                  | Yes                 | Yes             | Yes                  | Yes                   | Yes                                | Yes                      | Yes                 | Yes                 | Yes                | Yes            | Yes            | Yes            | Yes            | Not identified | Yes            |     |
| Bangladesh: Jamaica-modified                                           | Yes                       | Yes                 | Yes            | Yes             | Yes                         | Not identified                 | Yes                            | Yes                      | No                       | Yes                          | Yes                   | Yes                  | Yes                | Yes             | Yes       | Yes                  | Yes                             | Yes                 | Yes                   | Yes                           | Yes              | Yes                    | Yes       | Yes                       | Yes                   | Yes                             | Yes            | Yes                  | Yes                 | Yes             | Yes                  | Yes                   | Yes                                | Yes                      | Yes                 | Yes                 | Yes                | Yes            | Yes            | Yes            | Yes            | Not identified | Yes            |     |
| <b>Total number of programs</b>                                        |                           |                     |                |                 |                             |                                |                                |                          |                          |                              |                       |                      |                    |                 |           |                      |                                 |                     |                       |                               |                  |                        |           |                           |                       |                                 |                |                      |                     |                 |                      |                       |                                    |                          |                     |                     |                    |                |                |                |                |                |                |     |
| Yes                                                                    | 24                        | 28                  | 32             | 20              | 25                          | 14                             | 25                             | 12                       | 18                       | 15                           | 32                    | 32                   | 24                 | 32              | 30        | 15                   | 21                              | 15                  | 32                    | 32                            | 11               | 16                     | 13        | 21                        | 20                    | 23                              | 17             | 17                   | 16                  | 29              | 7                    | 25                    | 31                                 | 20                       | 18                  | 11                  | 24                 |                |                |                |                |                |                |     |
| No                                                                     | 9                         | 5                   | 1              | 13              | 8                           | 19                             | 8                              | 21                       | 15                       | 18                           | 1                     | 1                    | 9                  | 1               | 3         | 18                   | 12                              | 18                  | 1                     | 1                             | 22               | 17                     | 20        | 12                        | 13                    | 10                              | 16             | 17                   | 4                   | 26              | 8                    | 2                     | 13                                 | 15                       | 22                  | 5                   | 11                 |                |                |                |                |                |                |     |
| Not identified                                                         | 7                         | 3                   | 1              | 4               | 1                           | 19                             | 0                              | 2                        | 1                        | 3                            | 1                     | 1                    | 9                  | 1               | 3         | 16                   | 0                               | 17                  | 1                     | 1                             | 21               | 15                     | 20        | 11                        | 10                    | 10                              | 15             | 15                   | 13                  | 2               | 7                    | 8                     | 2                                  | 13                       | 14                  | 22                  | 5                  |                |                |                |                |                |                |     |
